# Supplementary material
Source: Springer Nature journal article supplement (https://www.springermedizin.de/resource/supplementary/12889_2010_2183_MOESM1_ESM.pdf/9484892)

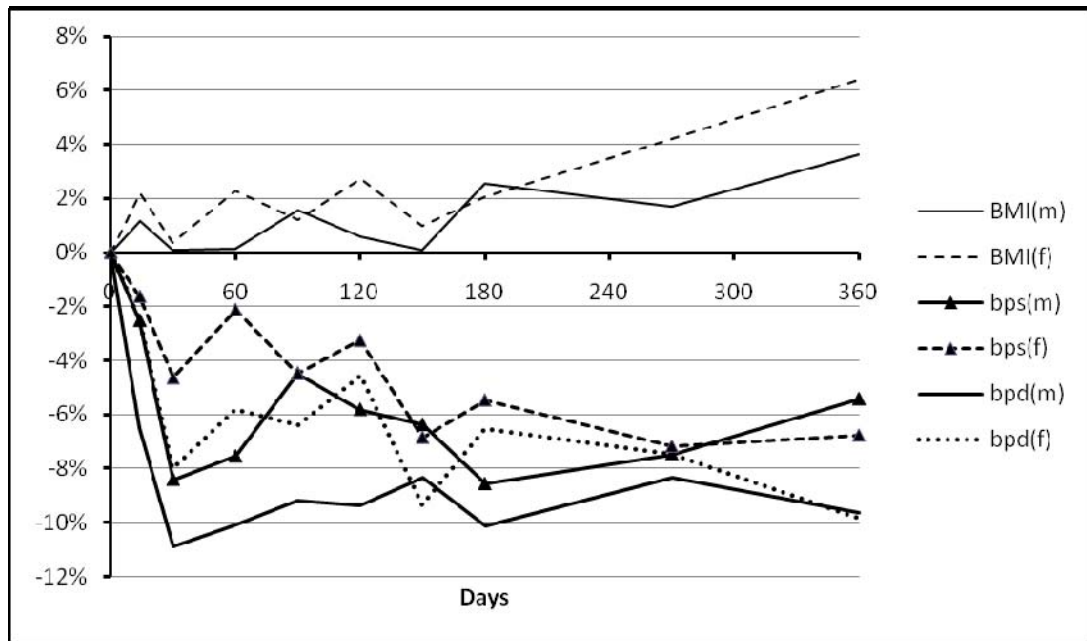

Supplement: MOESM1 [file 9484892]
